# Supplementary material for: The Interaction of BMP2‐Induced Defect Healing in Rat and Fixator Stiffness Modulates Matrix Alignment and Contraction
Source: PubMed Central journal article supplement (PMC6124159; doi:10.1002/jbm4.10031), 2018-04-17
Supplement: JBM4-2-174-s001.pdf [file JBM4-2-174-s001.pdf]

# Supplementary Information

## **Title:**

*The interaction of BMP2-induced defect healing in rat and fixator stiffness modulates matrix alignment and contraction*

## **Authors:**

Carolin Schwarz<sup>1,2,#</sup>, Claus-Eric Ott<sup>3,4,#</sup>, Dag Wulsten<sup>1</sup>, Erik Brauer<sup>1</sup>, Sophie Schreivogel<sup>1</sup>, Ansgar Petersen<sup>1,2</sup>, Kerstin Hassanein<sup>1</sup>, Linda Roewer<sup>1</sup>, Tanja Schmidt<sup>1,2</sup>, Bettina Willie<sup>5</sup>, Georg N. Duda<sup>1,2,\*</sup>

## **Affiliations:**

- 1.) Julius Wolff Institute and Center for Musculoskeletal Surgery, Charité – Universitätsmedizin Berlin, corporate member of Freie Universität Berlin, Humboldt-Universität zu Berlin, and Berlin Institute of Health, Berlin, Germany.
- 2.) Berlin-Brandenburg Center for Regenerative Therapies (BCRT), Charité – Universitätsmedizin Berlin, corporate member of Freie Universität Berlin, Humboldt-Universität zu Berlin, and Berlin Institute of Health, Berlin, Germany.
- 3.) Institute for Medical Genetics and Human Genetics, Charité – Universitätsmedizin Berlin, corporate member of Freie Universität Berlin, Humboldt-Universität zu Berlin, and Berlin Institute of Health, Berlin, Germany.
- 4.) Research Group Development and Disease, Max Planck Institute for Molecular Genetics, Berlin, Germany.
- 5.) Research Center, Shriners Hospitals for Children-Canada, Department of Pediatric Surgery, McGill University, Montreal, Canada.

# shared first authorship

## **Corresponding author:**

Prof. Dr. Georg N. Duda, Julius Wolff Institute and Center for Musculoskeletal Surgery, Berlin-Brandenburg Center for Regenerative Therapies, Charité – Universitätsmedizin Berlin, Augustenburger Platz 1, Berlin 13353, Germany  
Email: georg.duda@charite.de

## **Contents**

- Table S1.** Sequences of Primers used for qPCR  
**Table S2.** Quantitative *in vivo* MicroCT data  
**Table S3.** Statistical Analyses of Quantitative *in vivo* MicroCT data  
**Figure S1.** Representative histology of the control groups  
**Figure S2.** Singular value decomposition (SVD) of gene expression data  
**Figure S3.** SVD – Component 1  
**Figure S4.** SVD – Component 2  
**Figure S5.** SVD – Component 3  
**Figure S6.** SVD – Component 4  
**Figure S7.** Expression of candidate genes analyzed by qPCR on microarrays  
**Figure S8.** Expression pattern of the 285 high-variance genes in control groups  
**Figure S9.** Second-harmonic generation (SHG) microscopy  
**Figure S10.** Bioreactor-based analysis of load-induced ECM contraction

## **Supplementary methods**

**Table S1: Sequences of Primers used for qPCR.**

| Gene               | Forward                  | Reverse                   |
|--------------------|--------------------------|---------------------------|
| <i>Id1</i>         | ACTCTGAGTCTGAAGTCGCG     | CGGTAGTGTCTTTCCCCGG       |
| <i>Nog</i>         | AAGAAGCTGAGGAGGAAGTTACAG | GCACAGACTTGGATGGCTTAC     |
| <i>Col1a1</i>      | GCAACAGTCGATTCACCTACAG   | TGGGATGGAGGGAGTTTACA      |
| <i>Bmpr1a</i>      | GGAGGAATCGTGGAGGAATA     | TGTGAGTCTGGATGCTGGATTA    |
| <i>Bmpr1b</i>      | GGAGATGTGTTTCTGGAGGTATAG | GCCCAGCACTCTGTCATAAG      |
| <i>Bmpr2</i>       | CCAGAAGCCTGGAAAGAAAATAG  | GAGGAAGAGGAATAATCTGGGTAAG |
| <i>Ppia</i> (ENDO) | GCACTGGTGGCAAGTCCATCT    | TGCTCATGCCTTCTTTCACCTTC   |

**Table S2: Quantitative *in vivo* MicroCT data.**

| Day / Group                                                                       | Rigid           | Semi-rigid     | Flexible        |
|-----------------------------------------------------------------------------------|-----------------|----------------|-----------------|
| <b>Mineralized callus volume (BV) [mm<sup>3</sup>]</b>                            |                 |                |                 |
| 10                                                                                | 5,74 ± 3,05     | 10,26 ± 7,89   | 5,21 ± 3,47     |
| 21                                                                                | 72,70 ± 12,11   | 67,00 ± 29,37  | 75,39 ± 26,87   |
| 42                                                                                | 81,34 ± 16,78   | 69,15 ± 22,45  | 120,74 ± 9,78   |
| <b>Total callus volume (TV) [mm<sup>3</sup>]</b>                                  |                 |                |                 |
| 10                                                                                | 71,04 ± 46,91   | 72,81 ± 54,33  | 22,66 ± 19,52   |
| 21                                                                                | 118,07 ± 10,66  | 107,09 ± 26,08 | 126,15 ± 26,53  |
| 42                                                                                | 113,25 ± 18,71  | 96,85 ± 18,92  | 135,36 ± 18,07  |
| <b>Mineralized callus volume fraction (BV/TV) [mm<sup>3</sup>/mm<sup>3</sup>]</b> |                 |                |                 |
| 10                                                                                | 0,16 ± 0,16     | 0,24 ± 0,19    | 0,29 ± 0,10     |
| 21                                                                                | 0,61 ± 0,06     | 0,61 ± 0,10    | 0,59 ± 0,12     |
| 42                                                                                | 0,72 ± 0,08     | 0,70 ± 0,13    | 0,90 ± 0,07     |
| <b>Tissue mineral content (TMC) [mg HA/cm<sup>3</sup>]</b>                        |                 |                |                 |
| 10                                                                                | 3,39 ± 1,97     | 5,07 ± 3,72    | 3,05 ± 1,75     |
| 21                                                                                | 43,60 ± 6,26    | 40,04 ± 16,91  | 42,91 ± 16,24   |
| 42                                                                                | 61,11 ± 11,84   | 53,01 ± 15,06  | 89,56 ± 6,09    |
| <b>Tissue mineral density (TMD) [mg HA/cm<sup>3</sup>]</b>                        |                 |                |                 |
| 10                                                                                | 587,09 ± 158,18 | 515,44 ± 36,28 | 628,26 ± 110,28 |
| 21                                                                                | 601,76 ± 27,93  | 602,46 ± 39,65 | 564,60 ± 26,26  |
| 42                                                                                | 753,79 ± 28,49  | 777,42 ± 47,48 | 743,94 ± 55,13  |

**Table S3: Statistical Analyses of Quantitative *in vivo* MicroCT data.**

**a) Between-group comparisons, BV**

| Outcome measure | Stiffness  | Day | Shapiro-Wilks (normality) | equal variance ttest | Mann-Whitney-U | final adj $p$ -value Hochberg |
|-----------------|------------|-----|---------------------------|----------------------|----------------|-------------------------------|
| BV              | Rigid      | 10  | 0.302                     | <b>0.261</b>         | 0.537          | 0.392                         |
|                 | Semi-rigid |     | 0.854                     |                      |                |                               |
| BV              | Rigid      | 10  | 0.302                     | <b>0.803</b>         | 0.690          | 0.803                         |
|                 | Flexible   |     | 0.466                     |                      |                |                               |
| BV              | Semi-rigid | 10  | 0.854                     | <b>0.220</b>         | 0.329          | 0.392                         |
|                 | Flexible   |     | 0.466                     |                      |                |                               |
| BV              | Rigid      | 21  | 0.286                     | 0.696                | <b>0.329</b>   | 0.843                         |
|                 | Semi-rigid |     | <b>0.012</b>              |                      |                |                               |
| BV              | Rigid      | 21  | 0.286                     | <b>0.843</b>         | 0.999          | 0.843                         |
|                 | Flexible   |     | 0.682                     |                      |                |                               |
| BV              | Semi-rigid | 21  | <b>0.012</b>              | 0.636                | <b>0.662</b>   | 0.843                         |
|                 | Flexible   |     | 0.682                     |                      |                |                               |
| BV              | Rigid      | 42  | 0.751                     | <b>0.343</b>         | 0.429          | 0.343                         |
|                 | Semi-rigid |     | 0.762                     |                      |                |                               |
| BV              | Rigid      | 42  | 0.751                     | <b>0.002</b>         | 0.008          | 0.003                         |
|                 | Flexible   |     | 0.891                     |                      |                |                               |
| BV              | Semi-rigid | 42  | 0.762                     | <b>0.001</b>         | 0.004          | 0.003                         |
|                 | Flexible   |     | 0.891                     |                      |                |                               |

**b) Between-group comparisons, TV**

| Outcome measure | Stiffness  | Day | Shapiro-Wilks (normality) | equal variance ttest | Mann-Whitney-U | final adj $p$ -value Hochberg |
|-----------------|------------|-----|---------------------------|----------------------|----------------|-------------------------------|
| TV              | Rigid      | 10  | 0.719                     | <b>0.956</b>         | 0.999          | 0.956                         |
|                 | Semi-rigid |     | 0.347                     |                      |                |                               |
| TV              | Rigid      | 10  | 0.719                     | <b>0.066</b>         | 0.151          | 0.125                         |
|                 | Flexible   |     | 0.824                     |                      |                |                               |
| TV              | Semi-rigid | 10  | 0.347                     | <b>0.083</b>         | 0.177          | 0.125                         |
|                 | Flexible   |     | 0.824                     |                      |                |                               |
| TV              | Rigid      | 21  | 0.254                     | 0.404                | <b>0.126</b>   | 0.371                         |
|                 | Semi-rigid |     | <b>0.002</b>              |                      |                |                               |
| TV              | Rigid      | 21  | 0.254                     | <b>0.545</b>         | 0.548          | 0.545                         |
|                 | Flexible   |     | 0.993                     |                      |                |                               |
| TV              | Semi-rigid | 21  | <b>0.002</b>              | 0.262                | <b>0.247</b>   | 0.371                         |
|                 | Flexible   |     | 0.993                     |                      |                |                               |
| TV              | Rigid      | 42  | 0.318                     | <b>0.184</b>         | 0.126          | 0.184                         |
|                 | Semi-rigid |     | 0.102                     |                      |                |                               |
| TV              | Rigid      | 42  | 0.318                     | <b>0.094</b>         | 0.151          | 0.141                         |
|                 | Flexible   |     | 0.521                     |                      |                |                               |
| TV              | Semi-rigid | 42  | 0.102                     | <b>0.008</b>         | 0.030          | 0.024                         |
|                 | Flexible   |     | 0.521                     |                      |                |                               |



### c) Between-group comparisons, BV/TV

| Outcome measure | Stiffness  | Day | Shapiro-Wilks (normality) | equal variance ttest | Mann-Whitney-U | final adj $p$ -value Hochberg |
|-----------------|------------|-----|---------------------------|----------------------|----------------|-------------------------------|
| BV/TV           | Rigid      | 10  | 0.15                      | <b>0.480</b>         | 0.329          | 0.572                         |
|                 | Semi-rigid |     | 0.178                     |                      |                |                               |
| BV/TV           | Rigid      | 10  | 0.15                      | <b>0.138</b>         | 0.151          | 0.414                         |
|                 | Flexible   |     | 0.978                     |                      |                |                               |
| BV/TV           | Semi-rigid | 10  | 0.178                     | <b>0.572</b>         | 0.329          | 0.572                         |
|                 | Flexible   |     | 0.978                     |                      |                |                               |
| BV/TV           | Rigid      | 21  | 0.871                     | <b>0.909</b>         | 0.999          | 0.909                         |
|                 | Semi-rigid |     | 0.487                     |                      |                |                               |
| BV/TV           | Rigid      | 21  | 0.871                     | <b>0.673</b>         | 0.999          | 0.909                         |
|                 | Flexible   |     | 0.144                     |                      |                |                               |
| BV/TV           | Semi-rigid | 21  | 0.487                     | <b>0.767</b>         | 0.931          | 0.909                         |
|                 | Flexible   |     | 0.144                     |                      |                |                               |
| BV/TV           | Rigid      | 42  | 0.121                     | 0.838                | <b>0.931</b>   | 0.931                         |
|                 | Semi-rigid |     | <b>0.046</b>              |                      |                |                               |
| BV/TV           | Rigid      | 42  | 0.121                     | <b>0.005</b>         | 0.008          | 0.008                         |
|                 | Flexible   |     | 0.181                     |                      |                |                               |
| BV/TV           | Semi-rigid | 42  | <b>0.046</b>              | 0.015                | <b>0.004</b>   | 0.008                         |
|                 | Flexible   |     | 0.181                     |                      |                |                               |

### d) Between-group comparisons, TMD

| Outcome measure | Stiffness  | Day | Shapiro-Wilks (normality) | equal variance ttest | Mann-Whitney-U | final adj $p$ -value Hochberg |
|-----------------|------------|-----|---------------------------|----------------------|----------------|-------------------------------|
| TMD             | Rigid      | 10  | <b>0.006</b>              | 0.305                | <b>0.429</b>   | 0.429                         |
|                 | Semi-rigid |     | 0.119                     |                      |                |                               |
| TMD             | Rigid      | 10  | <b>0.006</b>              | 0.646                | <b>0.310</b>   | 0.429                         |
|                 | Flexible   |     | 0.401                     |                      |                |                               |
| TMD             | Semi-rigid | 10  | 0.119                     | <b>0.041</b>         | 0.052          | 0.123                         |
|                 | Flexible   |     | 0.401                     |                      |                |                               |
| TMD             | Rigid      | 21  | 0.777                     | <b>0.975</b>         | 0.931          | 0.975                         |
|                 | Semi-rigid |     | 0.26                      |                      |                |                               |
| TMD             | Rigid      | 21  | 0.777                     | <b>0.062</b>         | 0.095          | 0.153                         |
|                 | Flexible   |     | 0.239                     |                      |                |                               |
| TMD             | Semi-rigid | 21  | 0.26                      | <b>0.102</b>         | 0.247          | 0.153                         |
|                 | Flexible   |     | 0.239                     |                      |                |                               |
| TMD             | Rigid      | 42  | 0.866                     | <b>0.357</b>         | 0.429          | 0.536                         |
|                 | Semi-rigid |     | 0.257                     |                      |                |                               |
| TMD             | Rigid      | 42  | 0.866                     | <b>0.732</b>         | 0.841          | 0.732                         |
|                 | Flexible   |     | 0.972                     |                      |                |                               |
| TMD             | Semi-rigid | 42  | 0.257                     | <b>0.307</b>         | 0.429          | 0.536                         |
|                 | Flexible   |     | 0.972                     |                      |                |                               |

### e) Between-group comparisons, TMC

| Outcome measure | Stiffness  | Day | Shapiro-Wilks (normality) | equal variance ttest | Mann-Whitney-U | final adj p-value Hochberg |
|-----------------|------------|-----|---------------------------|----------------------|----------------|----------------------------|
| TMC             | Rigid      | 10  | 0.363                     | <b>0.391</b>         | 0.537          | 0.587                      |
|                 | Semi-rigid |     | 0.92                      |                      |                |                            |
| TMC             | Rigid      | 10  | 0.363                     | <b>0.775</b>         | 0.841          | 0.775                      |
|                 | Flexible   |     | 0.463                     |                      |                |                            |
| TMC             | Semi-rigid | 10  | 0.92                      | <b>0.296</b>         | 0.429          | 0.587                      |
|                 | Flexible   |     | 0.463                     |                      |                |                            |
| TMC             | Rigid      | 21  | 0.491                     | 0.671                | <b>0.082</b>   | 0.246                      |
|                 | Semi-rigid |     | <b>0.002</b>              |                      |                |                            |
| TMC             | Rigid      | 21  | 0.491                     | <b>0.935</b>         | 0.999          | 0.935                      |
|                 | Flexible   |     | 0.48                      |                      |                |                            |
| TMC             | Semi-rigid | 21  | <b>0.002</b>              | 0.782                | <b>0.931</b>   | 0.935                      |
|                 | Flexible   |     | 0.48                      |                      |                |                            |
| TMC             | Rigid      | 42  | 0.875                     | <b>0.355</b>         | 0.537          | 0.355                      |
|                 | Semi-rigid |     | 0.716                     |                      |                |                            |
| TMC             | Rigid      | 42  | 0.875                     | <b>0.001</b>         | 0.008          | 0.002                      |
|                 | Flexible   |     | 0.81                      |                      |                |                            |
| TMC             | Semi-rigid | 42  | 0.716                     | <b>0.001</b>         | 0.004          | 0.002                      |
|                 | Flexible   |     | 0.81                      |                      |                |                            |

### f) Time-series comparisons, BV

| Outcome measure | Day | Stiffness  | Shapiro-Wilks (normality) | equal variance ttest | Wilcoxon     | final adj p-value Hochberg |
|-----------------|-----|------------|---------------------------|----------------------|--------------|----------------------------|
| BV              | 10  | Rigid      | 0.302                     | <b>0.000</b>         | 0,063        | 0.000                      |
|                 | 21  |            | 0.286                     |                      |              |                            |
| BV              | 10  | Rigid      | 0.302                     | <b>0.000</b>         | 0,063        | 0.000                      |
|                 | 42  |            | 0.751                     |                      |              |                            |
| BV              | 21  | Rigid      | 0.286                     | <b>0.244</b>         | 0,313        | 0.244                      |
|                 | 42  |            | 0.751                     |                      |              |                            |
| BV              | 10  | Semi-rigid | 0.854                     | 0.003                | <b>0.031</b> | 0.047                      |
|                 | 21  |            | <b>0.012</b>              |                      |              |                            |
| BV              | 10  | Semi-rigid | 0.854                     | <b>0.001</b>         | 0.031        | 0.003                      |
|                 | 42  |            | 0.762                     |                      |              |                            |
| BV              | 21  | Semi-rigid | <b>0.012</b>              | 0.756                | <b>0.844</b> | 0.844                      |
|                 | 42  |            | 0.762                     |                      |              |                            |
| BV              | 10  | Flexible   | 0.466                     | <b>0.003</b>         | 0,063        | 0.005                      |
|                 | 21  |            | 0.682                     |                      |              |                            |
| BV              | 10  | Flexible   | 0.466                     | <b>0.000</b>         | 0,063        | 0.000                      |
|                 | 42  |            | 0.891                     |                      |              |                            |
| BV              | 21  | Flexible   | 0.682                     | <b>0.019</b>         | 0,063        | 0.019                      |
|                 | 42  |            | 0.891                     |                      |              |                            |

### g) Time-series comparisons, TV

| Outcome measure | Day | Stiffness  | Shapiro-Wilks (normality) | equal variance ttest | Wilcoxon     | final adj p-value Hochberg |
|-----------------|-----|------------|---------------------------|----------------------|--------------|----------------------------|
| TV              | 10  | Rigid      | 0.719                     | <b>0.117</b>         | 0,063        | 0.176                      |
|                 | 21  |            | 0.254                     |                      |              |                            |
| TV              | 10  | Rigid      | 0.719                     | <b>0.087</b>         | 0,125        | 0.176                      |
|                 | 42  |            | 0.318                     |                      |              |                            |
| TV              | 21  | Rigid      | 0.254                     | <b>0.613</b>         | 0,625        | 0.613                      |
|                 | 42  |            | 0.318                     |                      |              |                            |
| TV              | 10  | Semi-rigid | 0.347                     | 0.118                | <b>0.156</b> | 0.234                      |
|                 | 21  |            | <b>0.002</b>              |                      |              |                            |
| TV              | 10  | Semi-rigid | 0.347                     | <b>0.280</b>         | 0.438        | 0.280                      |
|                 | 42  |            | 0.102                     |                      |              |                            |
| TV              | 21  | Semi-rigid | <b>0.002</b>              | 0.087                | <b>0.156</b> | 0.234                      |
|                 | 42  |            | 0.102                     |                      |              |                            |
| TV              | 10  | Flexible   | 0.824                     | <b>0.000</b>         | 0,063        | <b>0.000</b>               |
|                 | 21  |            | 0.993                     |                      |              |                            |
| TV              | 10  | Flexible   | 0.824                     | <b>0.000</b>         | 0,063        | <b>0.000</b>               |
|                 | 42  |            | 0.521                     |                      |              |                            |
| TV              | 21  | Flexible   | 0.993                     | <b>0.340</b>         | 0,438        | 0.340                      |
|                 | 42  |            | 0.521                     |                      |              |                            |

### h) Time-series comparisons, BV/TV

| Outcome measure | Day | Stiffness  | Shapiro-Wilks (normality) | equal variance ttest | Wilcoxon     | final adj p-value Hochberg |
|-----------------|-----|------------|---------------------------|----------------------|--------------|----------------------------|
| BV/TV           | 10  | Rigid      | 0,150                     | <b>0.004</b>         | 0,063        | <b>0.006</b>               |
|                 | 21  |            | 0,871                     |                      |              |                            |
| BV/TV           | 10  | Rigid      | 0,150                     | <b>0.001</b>         | 0,063        | <b>0.003</b>               |
|                 | 42  |            | 0,121                     |                      |              |                            |
| BV/TV           | 21  | Rigid      | 0,871                     | <b>0.021</b>         | 0,063        | <b>0.021</b>               |
|                 | 42  |            | 0,121                     |                      |              |                            |
| BV/TV           | 10  | Semi-rigid | 0,178                     | <b>0.008</b>         | 0,031        | <b>0.024</b>               |
|                 | 21  |            | 0,487                     |                      |              |                            |
| BV/TV           | 10  | Semi-rigid | 0,178                     | 0.001                | <b>0.031</b> | <b>0.047</b>               |
|                 | 42  |            | <b>0,046</b>              |                      |              |                            |
| BV/TV           | 21  | Semi-rigid | 0,487                     | 0.051                | <b>0.063</b> | 0.063                      |
|                 | 42  |            | <b>0,046</b>              |                      |              |                            |
| BV/TV           | 10  | Flexible   | 0,978                     | <b>0.035</b>         | 0,063        | <b>0.035</b>               |
|                 | 21  |            | 0,144                     |                      |              |                            |
| BV/TV           | 10  | Flexible   | 0,978                     | <b>0.000</b>         | 0,063        | <b>0.000</b>               |
|                 | 42  |            | 0,181                     |                      |              |                            |
| BV/TV           | 21  | Flexible   | 0,144                     | <b>0.005</b>         | 0,063        | <b>0.008</b>               |
|                 | 42  |            | 0,181                     |                      |              |                            |

### i) Time-series comparisons, TMD

| Outcome measure | Day | Stiffness  | Shapiro-Wilks (normality) | equal variance ttest | Wilcoxon | final adj $p$ -value Hochberg |
|-----------------|-----|------------|---------------------------|----------------------|----------|-------------------------------|
| TMD             | 10  | Rigid      | 0.006                     | 0.841                | 0.625    | 0.625                         |
|                 | 21  |            | 0.777                     |                      |          |                               |
| TMD             | 10  | Rigid      | 0.006                     | 0.052                | 0.125    | 0.188                         |
|                 | 42  |            | 0.866                     |                      |          |                               |
| TMD             | 21  | Rigid      | 0.777                     | 0.001                | 0.063    | 0.003                         |
|                 | 42  |            | 0.866                     |                      |          |                               |
| TMD             | 10  | Semi-rigid | 0.119                     | 0.029                | 0.063    | 0.029                         |
|                 | 21  |            | 0.26                      |                      |          |                               |
| TMD             | 10  | Semi-rigid | 0.119                     | 0.000                | 0.031    | 0.000                         |
|                 | 42  |            | 0.257                     |                      |          |                               |
| TMD             | 21  | Semi-rigid | 0.26                      | 0.000                | 0.031    | 0.000                         |
|                 | 42  |            | 0.257                     |                      |          |                               |
| TMD             | 10  | Flexible   | 0.401                     | 0.329                | 0.625    | 0.329                         |
|                 | 21  |            | 0.239                     |                      |          |                               |
| TMD             | 10  | Flexible   | 0.401                     | 0.144                | 0.188    | 0.216                         |
|                 | 42  |            | 0.972                     |                      |          |                               |
| TMD             | 21  | Flexible   | 0.239                     | 0.000                | 0.063    | 0.000                         |
|                 | 42  |            | 0.972                     |                      |          |                               |

### j) Time-series comparisons, TMC

| Outcome measure | Day | Stiffness  | Shapiro-Wilks (normality) | equal variance ttest | Wilcoxon | final adj $p$ -value Hochberg |
|-----------------|-----|------------|---------------------------|----------------------|----------|-------------------------------|
| TMC             | 10  | Rigid      | 0.363                     | 0.000                | 0.063    | 0.000                         |
|                 | 21  |            | 0.491                     |                      |          |                               |
| TMC             | 10  | Rigid      | 0.363                     | 0.000                | 0.063    | 0.000                         |
|                 | 42  |            | 0.875                     |                      |          |                               |
| TMC             | 21  | Rigid      | 0.491                     | 0.011                | 0.063    | 0.011                         |
|                 | 42  |            | 0.875                     |                      |          |                               |
| TMC             | 10  | Semi-rigid | 0.920                     | 0.002                | 0.031    | 0.031                         |
|                 | 21  |            | 0.002                     |                      |          |                               |
| TMC             | 10  | Semi-rigid | 0.920                     | 0.001                | 0.031    | 0.003                         |
|                 | 42  |            | 0.716                     |                      |          |                               |
| TMC             | 21  | Semi-rigid | 0.002                     | 0.024                | 0.031    | 0.031                         |
|                 | 42  |            | 0.716                     |                      |          |                               |
| TMC             | 10  | Flexible   | 0.463                     | 0.004                | 0.063    | 0.004                         |
|                 | 21  |            | 0.480                     |                      |          |                               |
| TMC             | 10  | Flexible   | 0.463                     | 0.000                | 0.063    | 0.000                         |
|                 | 42  |            | 0.810                     |                      |          |                               |
| TMC             | 21  | Flexible   | 0.480                     | 0.002                | 0.063    | 0.003                         |
|                 | 42  |            | 0.810                     |                      |          |                               |

**Figure S1:**

**A. Positive control**

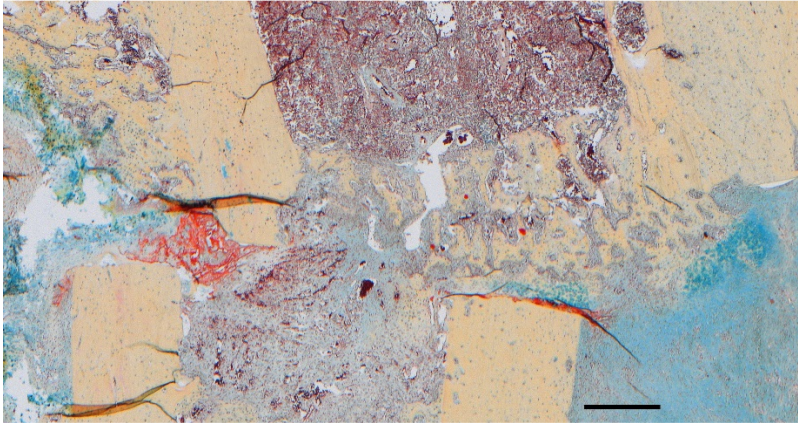

**B. Negative control**

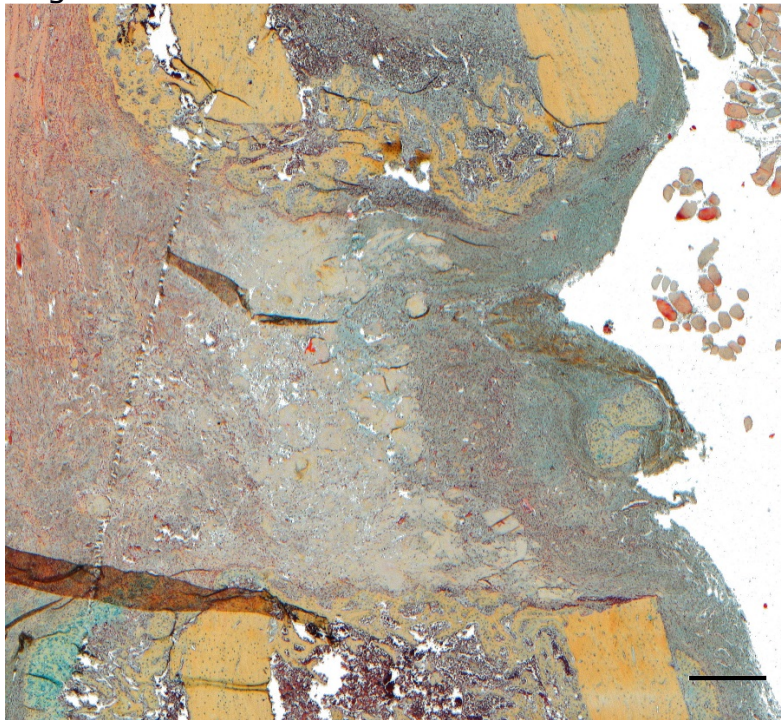

**Figure S1. Representative histology of the control groups at day 14 post-operation.**

**(A) Positive control (1mm osteotomy, top).** The periosteal callus was characterized by woven bone with cartilage islands and some hematoma residues around the osteotomy ends. The endosteal callus separated the medullary canal tissue from the osteotomy gap that was filled with a proliferative tissue matrix. **(B) Negative control (untreated 5mm defect, bottom).** The defect site was filled with fibrous connective tissue and hematoma residues. Furthermore, residues of the absorbable collagen sponge were still detectable (Histology: Movat Pentachrome staining, scale bars: 500  $\mu$ m).

**Figure S2:**

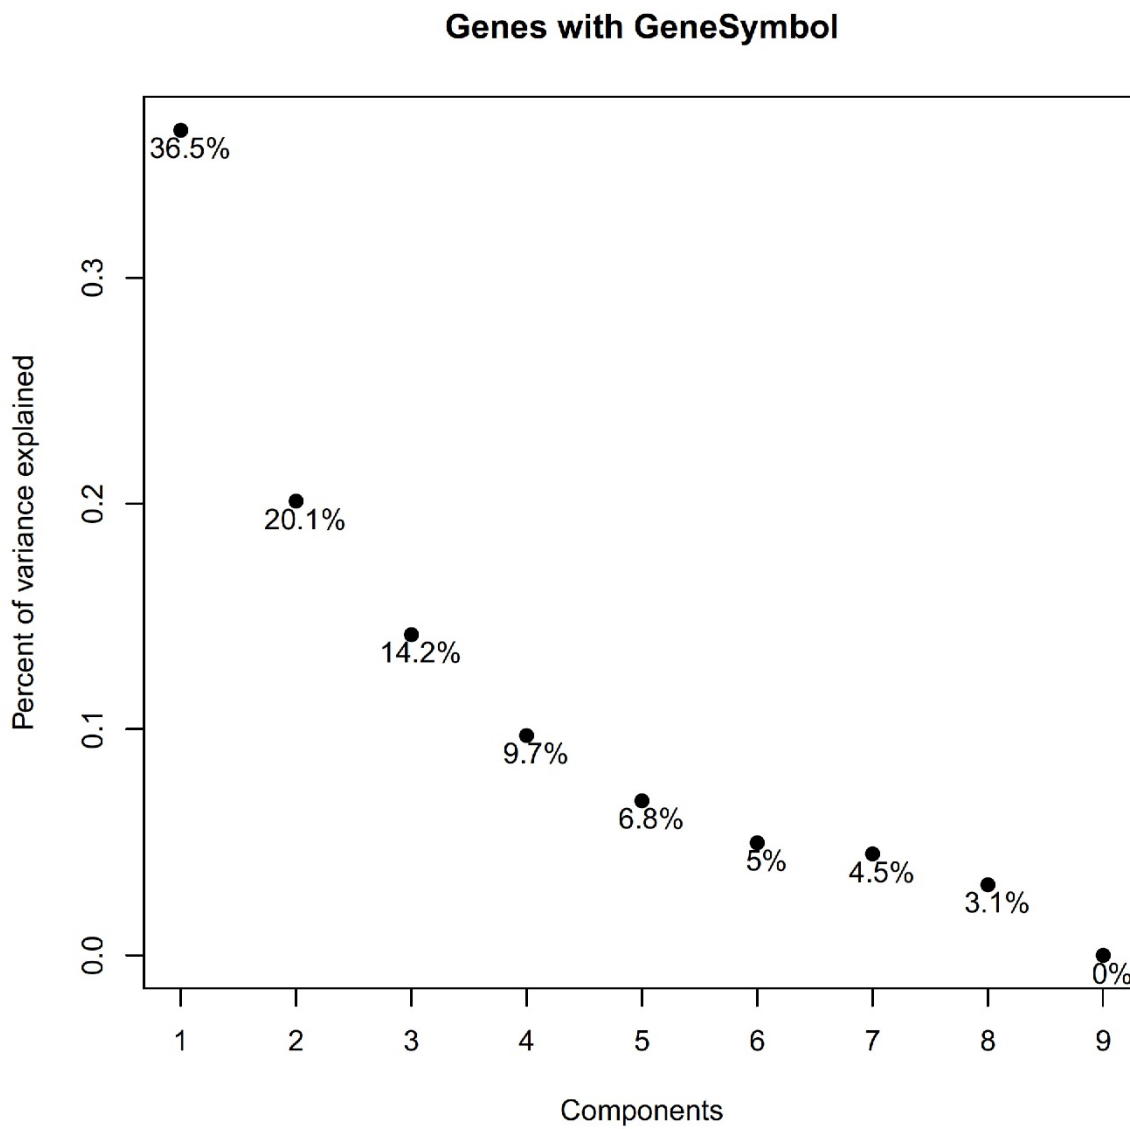

**Figure S2. Singular value decomposition of gene expression data.** Gene expression data of all entities annotated to a gene symbol were analyzed by singular value decomposition. The top four components explain more than 80 % of variance of gene expression ( $36.5+20.1+14.2+9.7=80.5$ ).



**Figure S3:**

| ID         | name                  | Study term | Pop term | p.adjusted |
|------------|-----------------------|------------|----------|------------|
| GO:0031012 | extracellular matrix  | 13         | 397      | 3.73E-10   |
| GO:0043292 | contractile fiber     | 9          | 206      | 4.94E-05   |
| GO:0003012 | muscle system process | 9          | 339      | 0.007      |

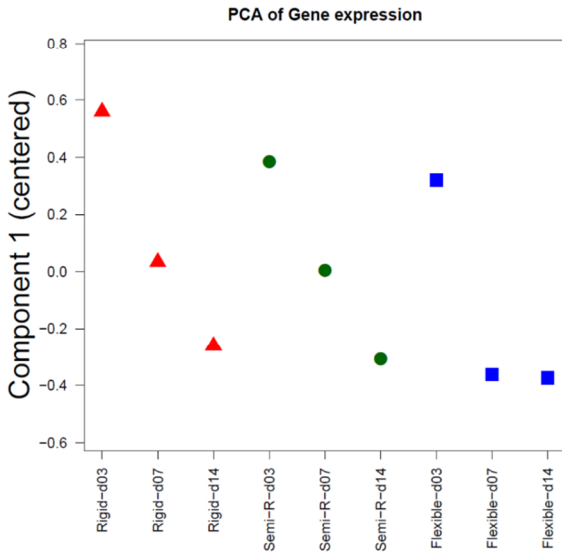

| ID         | name                          | Study term | Pop term | p.adjusted |
|------------|-------------------------------|------------|----------|------------|
| GO:0002376 | immune system process         | 22         | 2196     | 1.60E-07   |
| GO:0009607 | response to biotic stimulus   | 16         | 884      | 2.56E-04   |
| GO:0050817 | coagulation                   | 8          | 178      | 8.14E-04   |
| GO:0051704 | multi-organism process        | 16         | 1883     | 0.001      |
| GO:0005615 | extracellular space           | 23         | 1419     | 0.003      |
| GO:0009605 | response to external stimulus | 21         | 1999     | 0.013      |
| GO:0070488 | neutrophil aggregation        | 2          | 3        | 0.036      |

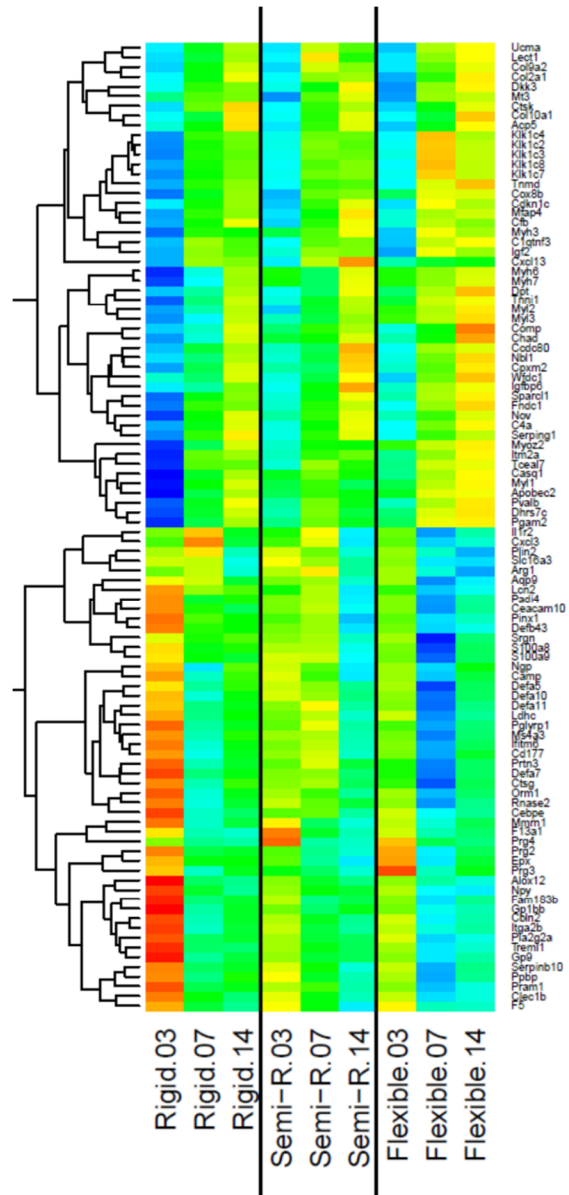

**Figure S3. SVD – Component 1.** Component 1 is the strongest component influencing variance of gene expression data. It explains 36.5 % of variance (cf. Suppl. Fig. S2). Component 1 captures gene regulation over time and comprises time dependent upregulation as well as time-dependent downregulation (red triangles: Rigid group, green dots: Semi-rigid group, blue squares: Flexible group). For each direction of regulation, top 50 genes annotated to a GO term were selected. In total top 100 genes were scaled to a mean of 0 and variance of 1 and subjected to hierarchical clustering (right). GO analyses were performed with the Parent-Child-Intersection (PCI-method) of Ontologizer. Terms with Bonferroni-adjusted  $p < 0.05$  are displayed for genes of the corresponding cluster (top: upregulated genes, bottom: downregulated genes). Although the overall pattern is very similar, some differences between experimental groups can be observed. Upregulated genes are associated with 'extracellular matrix' and 'contractile fiber'. Products of downregulated genes are localized in the 'extracellular space' and involved in 'immune system process'-es.

**Figure S4:**

| ID         | name                           | Study term | Pop term | p.adjusted |
|------------|--------------------------------|------------|----------|------------|
| GO:0002376 | immune system process          | 31         | 2196     | 1.94E-18   |
| GO:0001775 | cell activation                | 15         | 876      | 1.27E-05   |
| GO:0070661 | leukocyte proliferation        | 9          | 303      | 0.006      |
| GO:0098552 | side of membrane               | 9          | 499      | 0.020      |
| GO:0048872 | homeostasis of number of cells | 10         | 281      | 0.028      |
| GO:0017171 | serine hydrolase activity      | 7          | 217      | 0.038      |

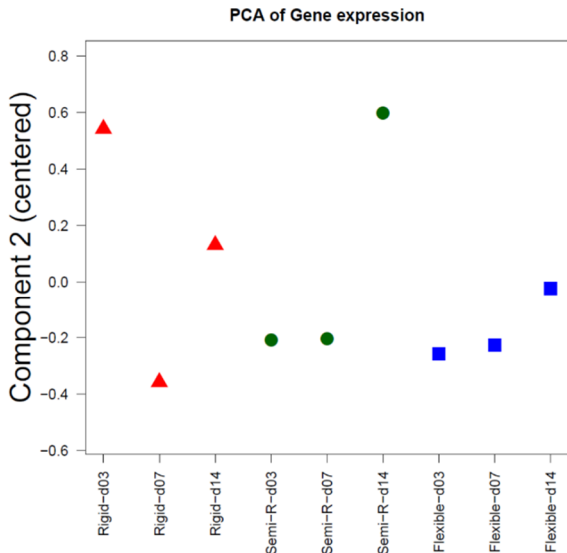

| ID         | name                              | Study term | Pop term | p.adjusted |
|------------|-----------------------------------|------------|----------|------------|
| GO:0043292 | contractile fiber                 | 16         | 206      | 1.63E-10   |
| GO:0003012 | muscle system process             | 11         | 339      | 1.74E-05   |
| GO:0061061 | muscle structure development      | 11         | 610      | 1.82E-04   |
| GO:0008092 | cytoskeletal protein binding      | 13         | 811      | 0.012      |
| GO:0050879 | multicellular organismal movement | 4          | 45       | 0.025      |

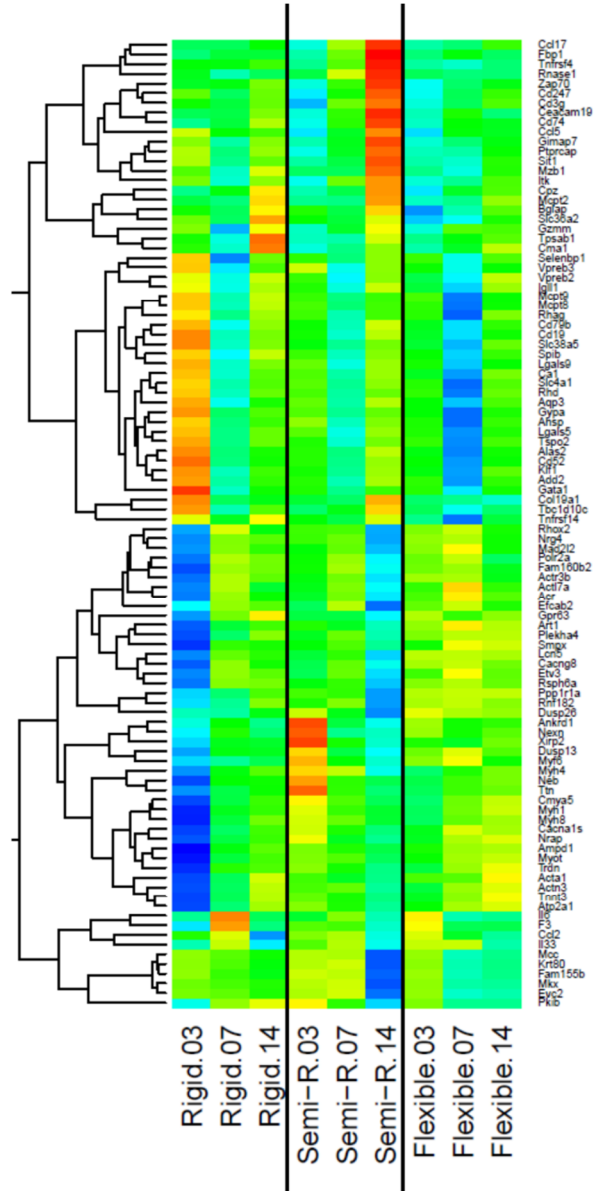

**Figure S4. SVD – Component 2.** Component 2 explains about 20 % of variance (cf. Suppl. Fig. S2). Expression levels are high (top of heatmap) and low (bottom of heatmap) in the rigid group at day 3 and show strong regulation in the semi-rigid group at day 14. Genes that contribute to component 2 are annotated to immunological processes and terms related to cellular contraction.



**Figure S5:**

| ID         | name                         | Study term | Pop term | p.adjusted |
|------------|------------------------------|------------|----------|------------|
| GO:0043292 | contractile fiber            | 13         | 206      | 7.59E-08   |
| GO:0003012 | muscle system process        | 10         | 339      | 2.03E-06   |
| GO:0008092 | cytoskeletal protein binding | 14         | 811      | 2.04E-04   |
| GO:0061061 | muscle structure development | 12         | 610      | 0.002      |
| GO:0030029 | actin filament-based process | 10         | 611      | 0.006      |
| GO:0031432 | titin binding                | 4          | 9        | 0.011      |

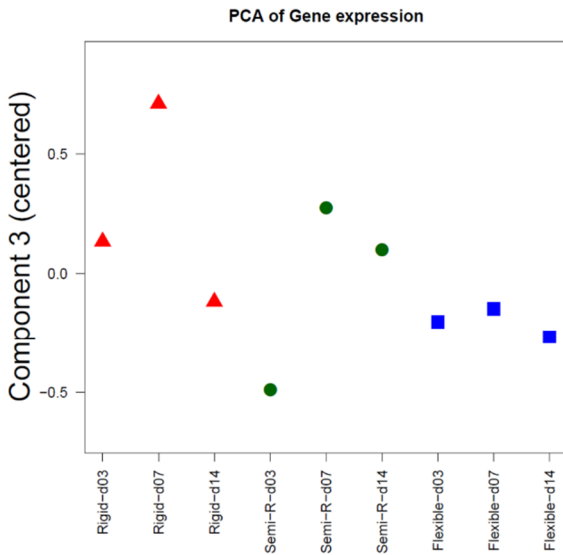

| ID         | name                              | Study term | Pop term | p.adjusted |
|------------|-----------------------------------|------------|----------|------------|
| GO:0002376 | immune system process             | 27         | 2196     | 3.35E-12   |
| GO:0040011 | locomotion                        | 15         | 1495     | 5.61E-04   |
| GO:0005125 | cytokine activity                 | 10         | 216      | 0.001      |
| GO:0051704 | multi-organism process            | 16         | 1883     | 0.002      |
| GO:0034097 | response to cytokine              | 15         | 541      | 0.003      |
| GO:0001906 | cell killing                      | 5          | 111      | 0.008      |
| GO:0009607 | response to biotic stimulus       | 15         | 884      | 0.009      |
| GO:0001816 | cytokine production               | 12         | 604      | 0.012      |
| GO:0005126 | cytokine receptor binding         | 10         | 284      | 0.015      |
| GO:0006952 | defense response                  | 22         | 1336     | 0.023      |
| GO:0072593 | reactive oxygen species metabolic | 7          | 235      | 0.030      |

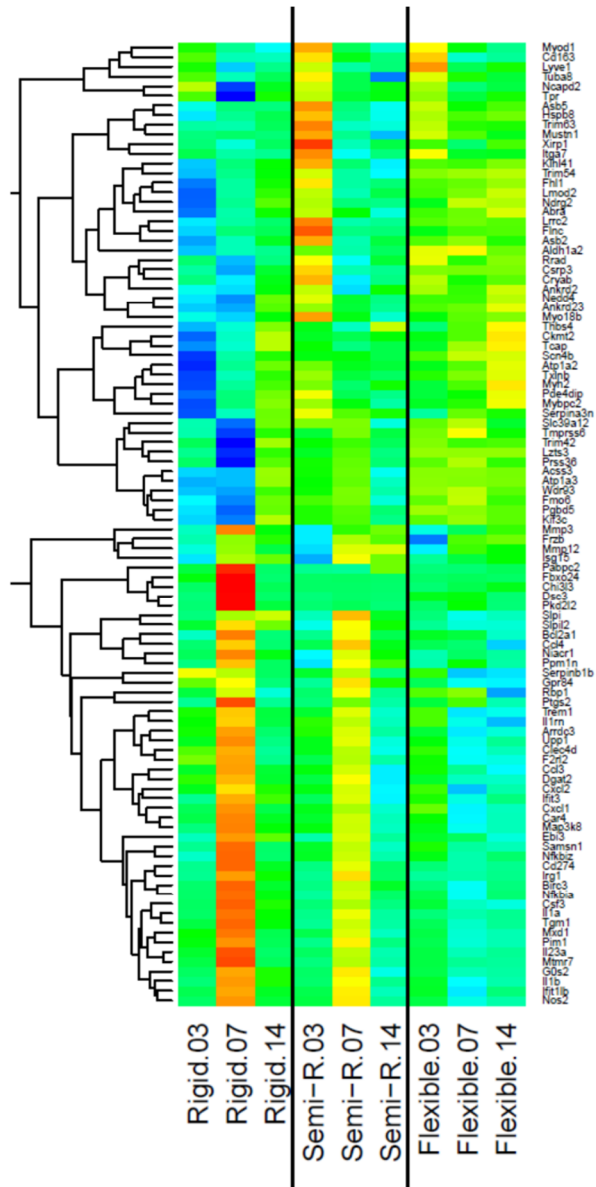

**Figure S5. SVD – Component 3.** Component 3 explains about 14 % of variance (cf. Suppl. Fig. S2). From the point of view of the experimental setup, genes contributing to this component are highly interesting as they reflect the three different fixator stiffness groups. Strongest induction and downregulation was observed at day 7 in the rigid group, medium regulation in the semi-rigid group and rather unaltered expression levels were observed in the flexible group. This signature is more obvious in the top 50 genes with upregulation at day 7 (bottom of heatmap). These genes are annotated to terms related to the immune system and 'cytokine activity' as well as 'cytokine production'. Genes with opposite regulation pattern are related to the 'contractile fiber' apparatus and 'actin-filament based process'.

**Figure S6:**

| ID         | name                              | Study term | Pop term | p.adjusted |
|------------|-----------------------------------|------------|----------|------------|
| GO:0031012 | extracellular matrix              | 12         | 397      | 4.11E-08   |
| GO:0001503 | ossification                      | 14         | 379      | 5.63E-06   |
| GO:0031214 | biomineral tissue development     | 8          | 128      | 0.020      |
| GO:0016787 | hydrolase activity                | 18         | 2413     | 0.038      |
| GO:0043062 | extracellular structure organizer | 6          | 213      | 0.049      |

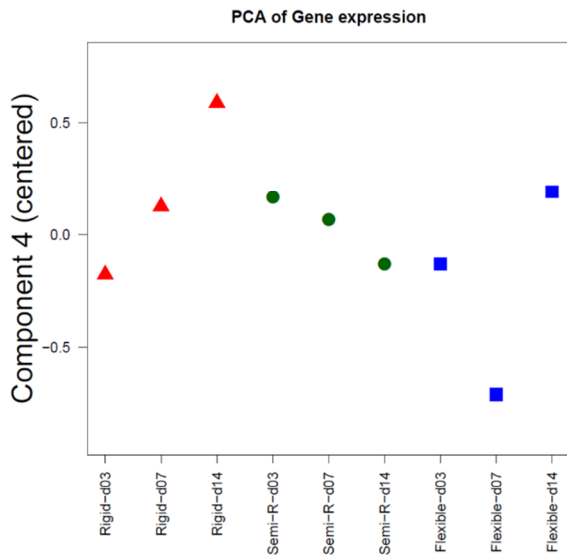

n.s.

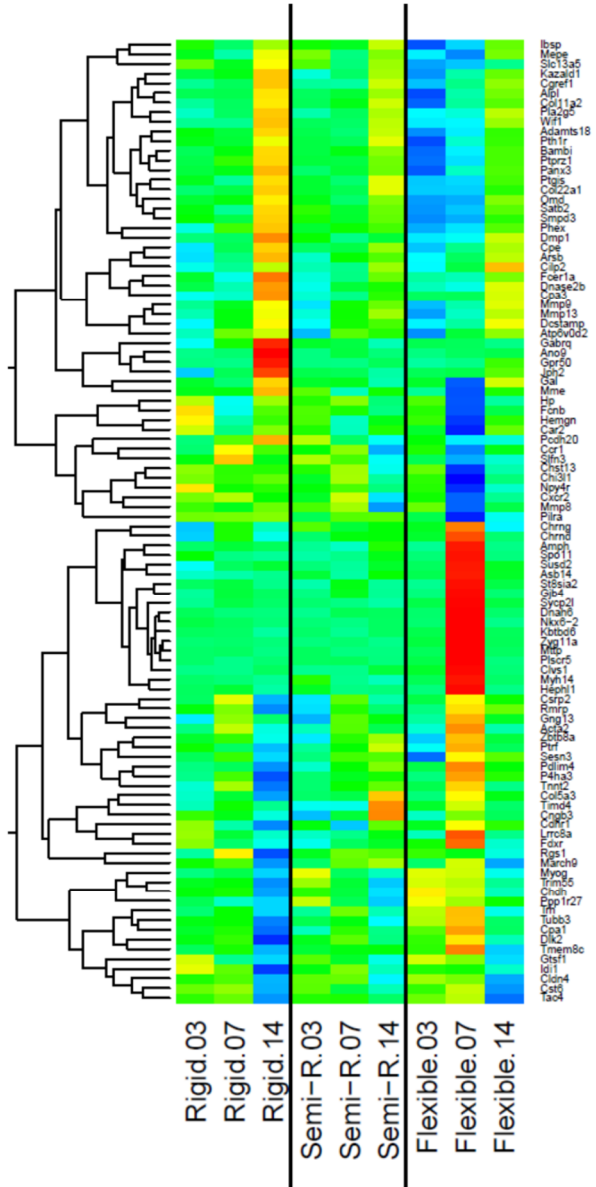

**Figure S6. SVD – Component 4.** Component 4 explains about 10 % of variance (cf. Suppl. Fig. S2). Although the overall expression pattern of genes contributing to this component is very different between experimental groups, hierarchical clustering reveals that there are two major blocks with differential regulation in the flexible group at day 7 and additional clusters that show differential expression related to gene regulation in the other two groups. Of note, 14 of the upper top 50 genes are annotated to ‘ossification’ where induction is obviously delayed in the flexible group. GO analysis of genes localized in the lower part of the heatmap revealed no significant GO term (n.s.).

**Figure S7:**

**Target gene expression based on**

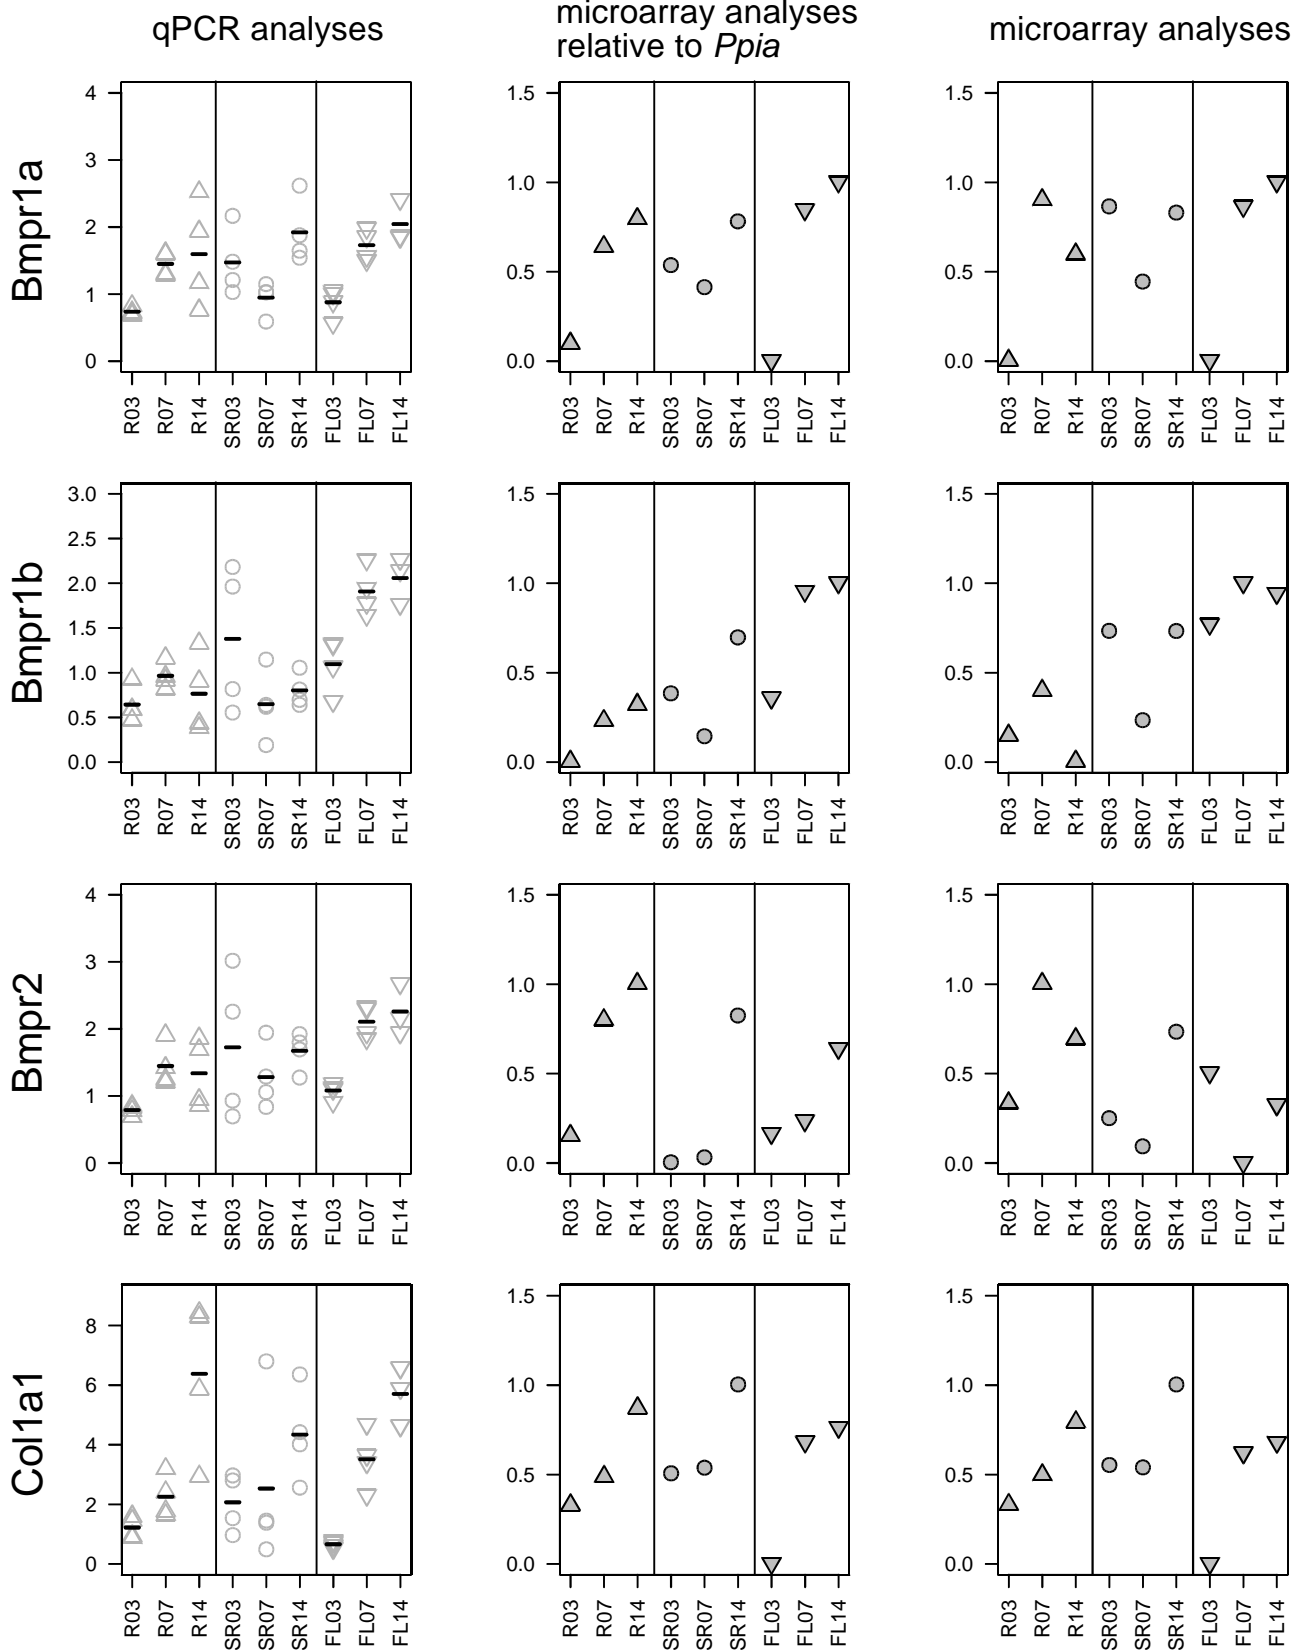

--- continued next page ---

### Target gene expression based on

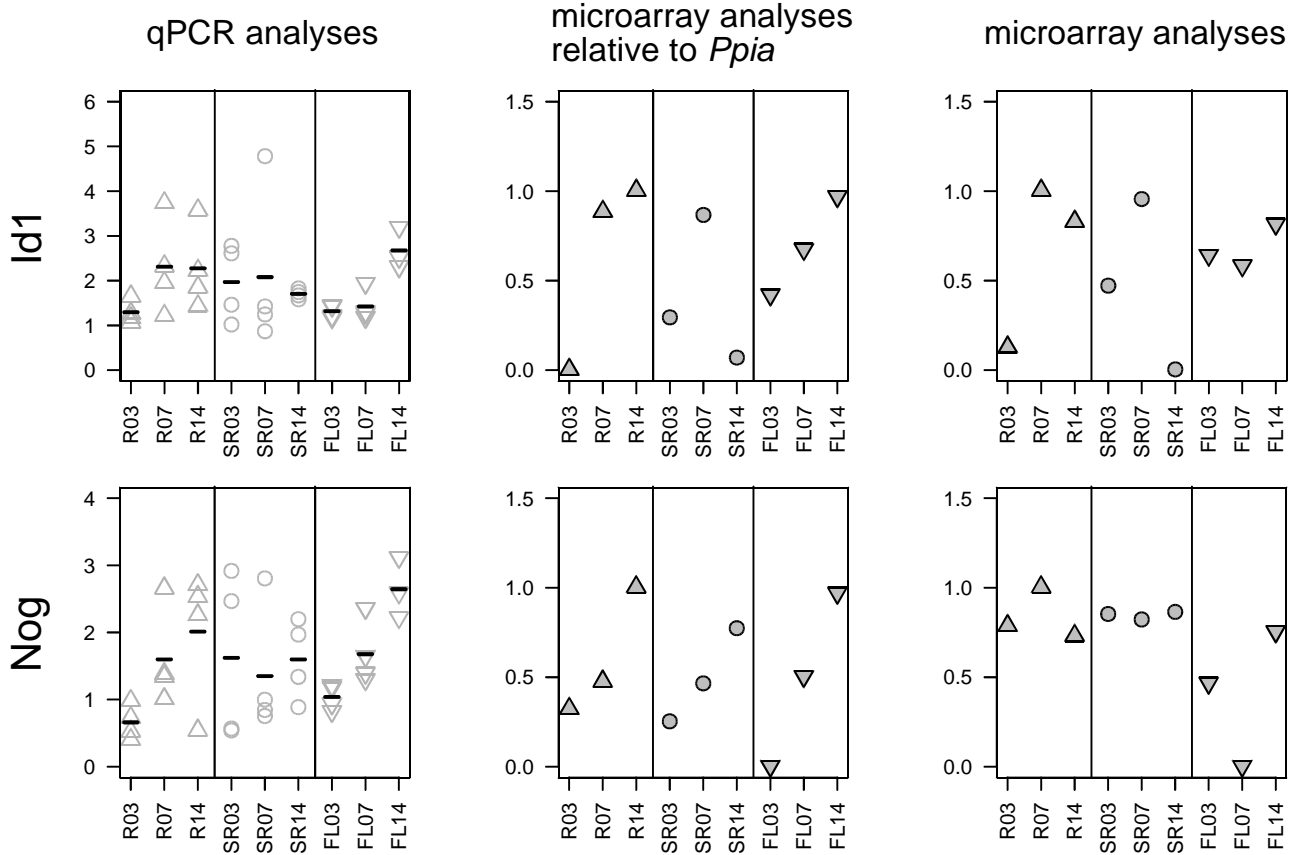

**Figure S7. Expression of candidate genes analyzed by qPCR on microarrays.** Left column displays expression values as determined by qPCR and shown in Figure 3 (R03 corresponds to Rigid group at day 3, SR. Semi-rigid group, FL. Flexible group, 07. day 7, 14. day 14). Middle column shows target gene expression relative to *Cyclophylin A (Ppia)* which was used as endogenous reference gene in qPCR analyses. These values are based on microarray data. Right column indicates expression values of these genes as determined by microarray analyses. (Middle and Right) Expression values derived from microarray analyses were rescaled to a minimum of zero and a maximum of one. Expression of *Bmpr1a*, *Bmpr1b*, *Col1a1* and *Id1* is very similar over all quantification approaches while expression of *Nog* displays changes in expression pattern dependent on the quantification method. Observed differences could be explained by differential expression of the reference genes used for qPCR analyses or limitations of determination of low level expression (running into background) when using microarrays.

**Figure S8:**

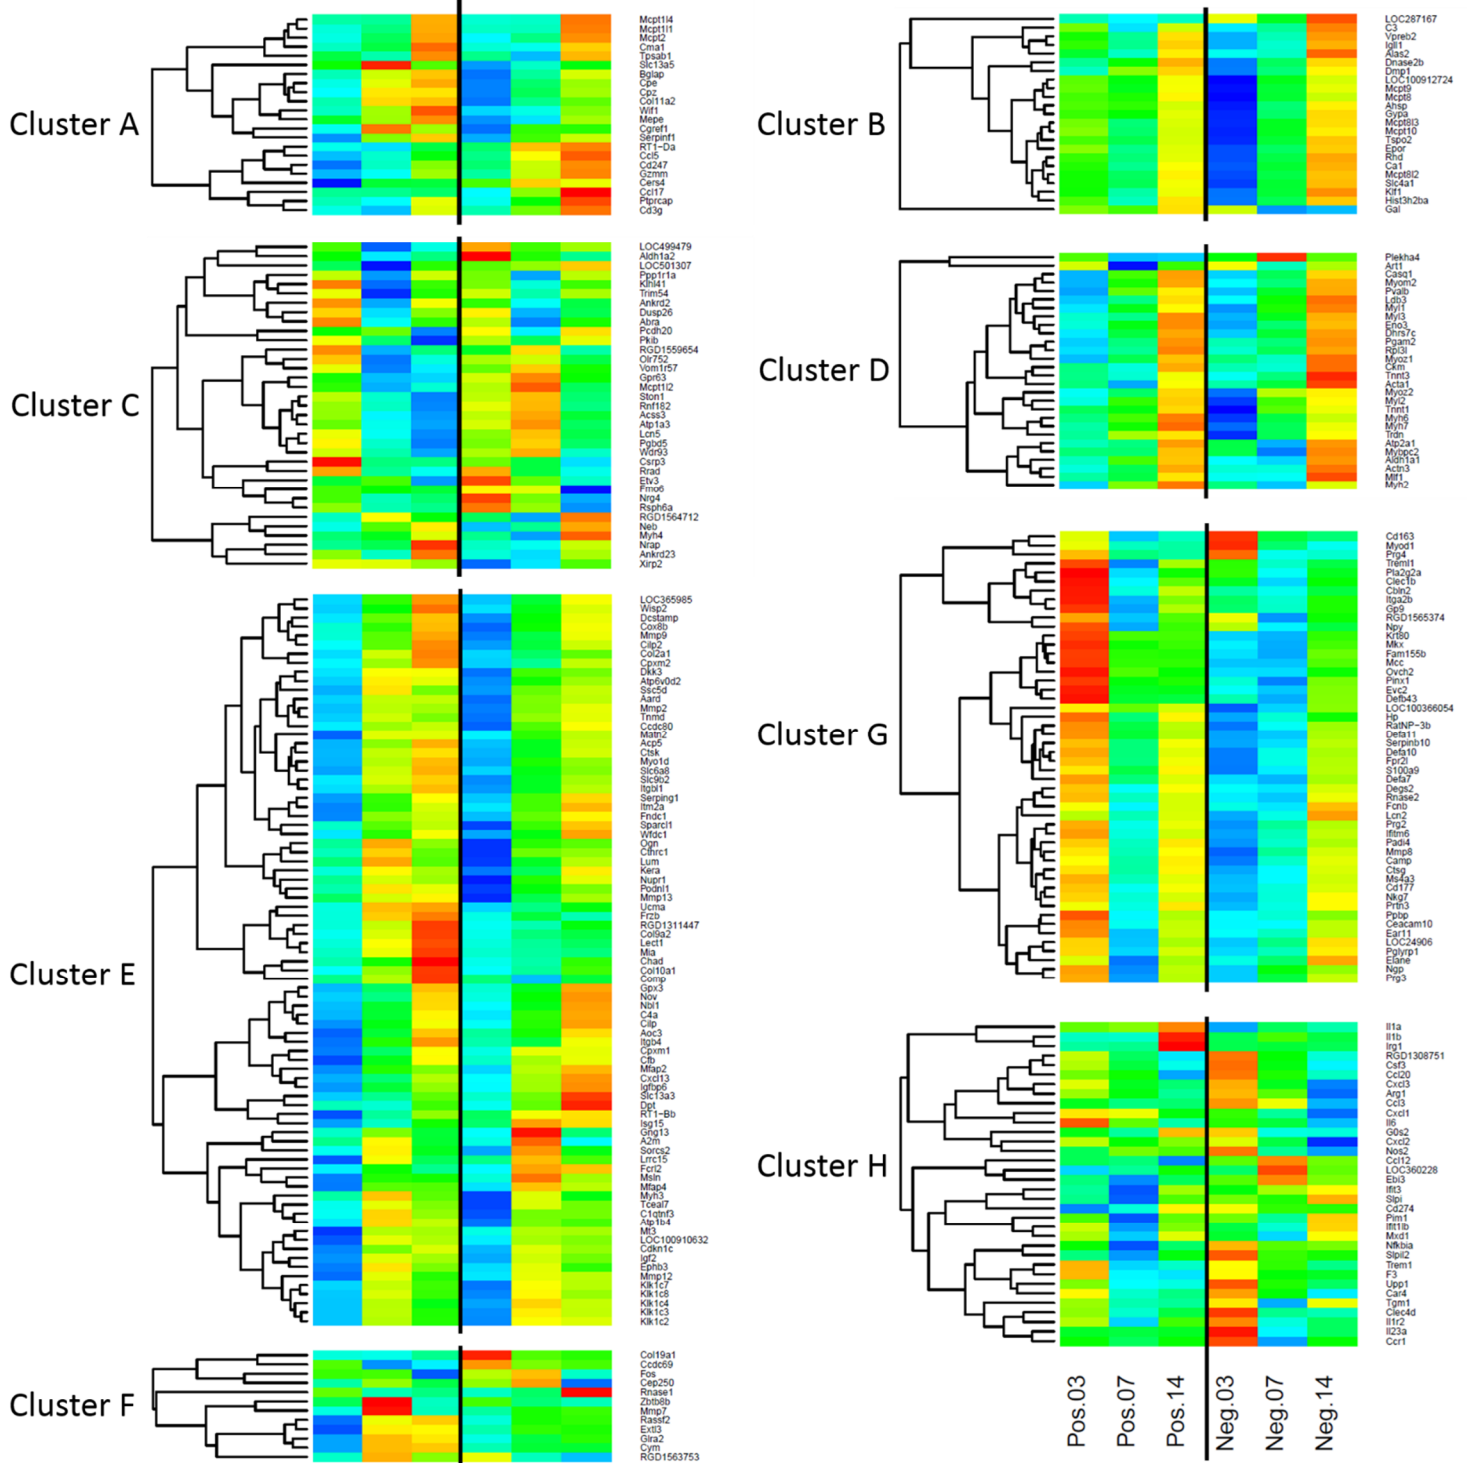

**Figure S8. Expression pattern of the 285 high-variance genes in control groups.** Genes of each cluster derived from Figure 5 were subjected to hierarchical clustering. The majority of these genes are differentially expressed in the control groups. Regarding genes from cluster A, *Bglap*, *Col11a2*, and *Mepe* display increasing expression levels in the positive, but not in the negative control where several cytokines are more highly expressed at later time points. Genes derived from cluster B including *Dmp1* have lowest expression levels in the negative control at day 3. Expression levels of genes from cluster C

mainly decrease in the positive, but increase in the negative control. A larger group of the genes from cluster D (*Myh6*, *Myh7*, *Myl2*, *Myoz2*, *Tnnt1*, and *Trdn*) display lower expression levels in the negative control. Regarding cluster E, similar to the pattern in the experimental groups increasing expression over time can be observed in the control groups. In the positive control at day 14 there are highest expression levels of the chondrocyte marker genes *Comp*, *Col10a1*, *Chad*, *Mia*, *Lect1* (chondromodulin), and *Col9a2*. As in the experimental groups, the majority of genes from cluster G shows an intermittent drop of expression at day 7 in the positive control while there is a slight induction in the negative control at day 14. The anti-inflammatory receptor *Cd163* and the myogenic factor *Myod1* show high expression levels in the negative control at day 3. Several cytokines from cluster H display higher expression levels in the negative control, especially at day 3.

**Figure S9:**

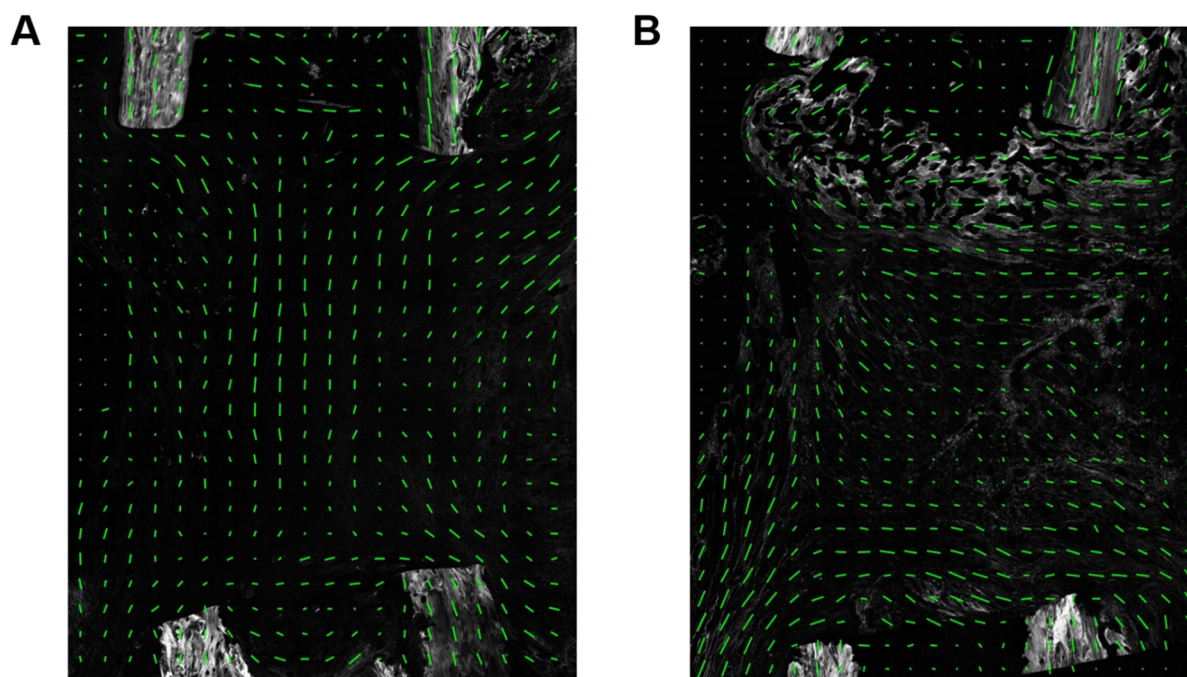

**Figure S9. Second-harmonic generation (SHG) microscopy. (A) Flexible group at day 14.** Fiber orientation in the middle of the defect runs in parallel to the bone axis (picture of a different animal of the flexible group, cf. Figure 6A). Overall, fiber orientation within the defect site resembles the shape of a sandglass. **(B) Semi-rigid group at day 14.** Fiber orientation at the margins of the fracture site runs in parallel to the bone axis while perpendicular fibers seal the medullary canal (picture of a different animal of the semi-rigid group, cf. Figure 6B). Organization of the fracture site is reminiscent of a crate or bowl shaped shelter. **(A, B)** Structures were visualized by SHG because collagen fiber orientation could not be visualized by Sirius Red staining and polarization microscopy. For SHG analyses, we selected sections without mineralized tissue. In the rigid group, all sections obtained by histology at day 14 contained significant amounts of mineralized tissue. Therefore, SHG was not applicable.



**Figure S10:**

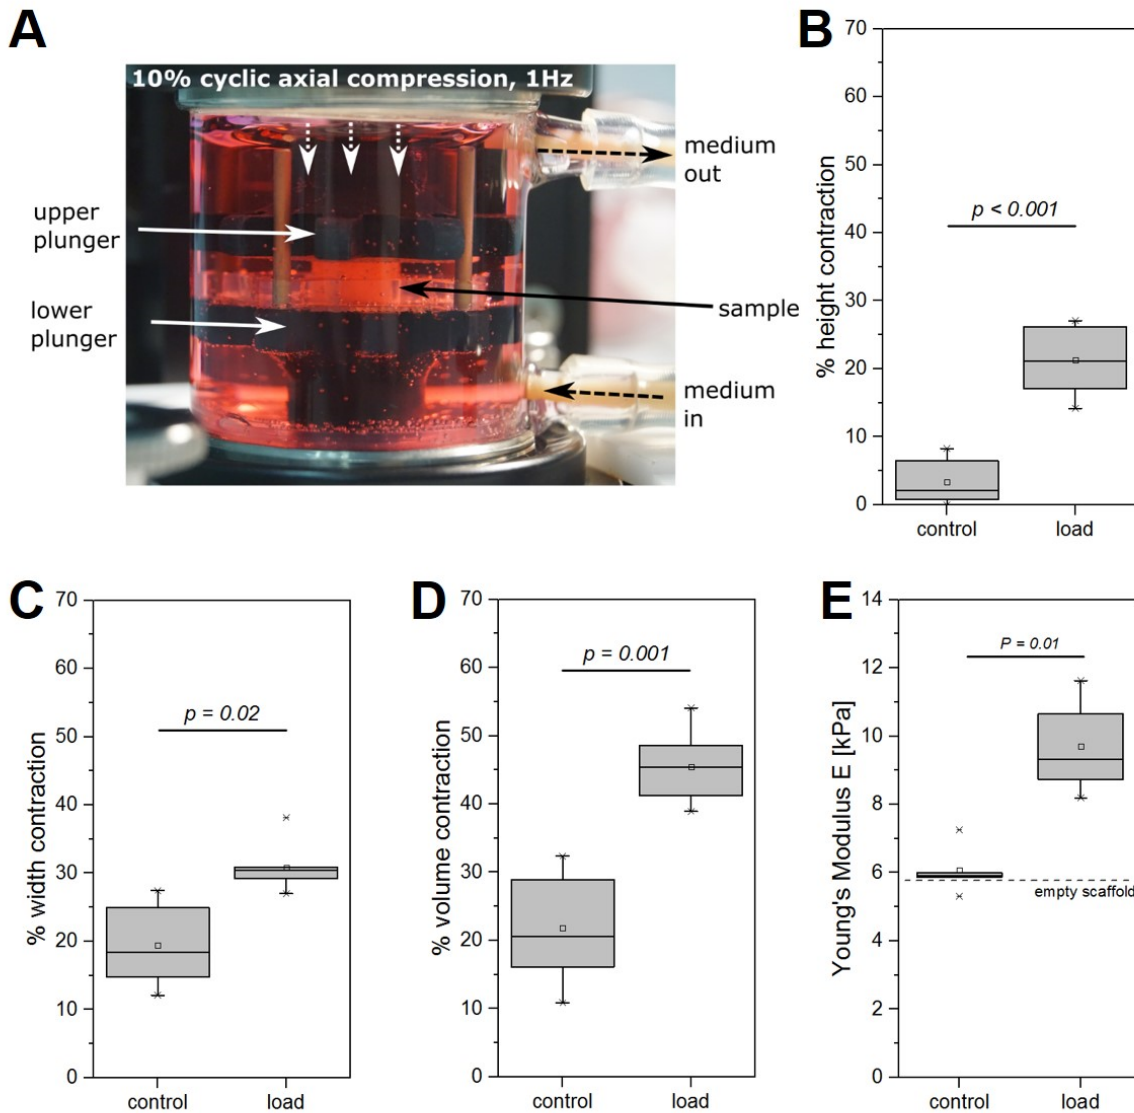

**Figure S10. Bioreactor-based analysis of load-induced ECM contraction. (A)** Custom-made mechano-bioreactor system used to apply 3 h cyclic monoaxial compression ( $f=1.0$  Hz,  $2A=300 \mu\text{m} \pm 10\%$  scaffold height) and 5 h resting consistently repeated over one week. During resting phase this system automatically readjusts sample position to ensure proper mechanical stimulation. **(B) Significant height contraction upon loading.** Height refers to change of the scaffold height in parallel to loading/compression. **(C) Significant width contraction upon loading.** Width refers to change of the scaffold width, which is perpendicular to loading/compression. **(B, C)** Both parameters were combined for calculation of volume contraction as described in supplementary methods and shown in **(D) Significant difference in volume contraction upon loading.** **(B-D)**  $n=8$  per group. Of note, the scaffolds used in these analyses have elastic mechanical properties. Therefore, height contraction is not a pure consequence of squeezing the scaffolds, which in turn would result in an increase but not decrease of the scaffold width. **(E)** Sample contraction leads to a significant increase in stiffness/rigidity as determined by Young's modulus ( $n=5$  per group).

## Supplementary methods

### *Cells, culture medium and seeding*

Human fibroblasts were used in passages 6–9, expanded in Dulbecco's modified Eagle's medium (DMEM, #14965-039; Gibco, Life Technologies) supplemented with 10 vol% fetal bovine serum (FBS, #S0615; Biochrom AG), 1 vol% penicillin/streptomycin (#A2213; Biochrom AG), and 1 vol% nonessential amino acids (#K0293; Biochrom AG) in a humid incubator with 5 % CO<sub>2</sub>. For bioreactor experiments FBS was reduced to 2 vol%, and 1.36 mM ascorbic acid was added to foster collagen formation. After expansion, cells were trypsinized and a cell concentration of 7500 cells/ $\mu$ L was adjusted. Collagen scaffolds (3 mm height, 5 mm diameter, Matricel GmbH) were seeded by dipping into the suspension and placed into an empty 12 well plate for one hour to allow cell adhesion to the scaffold walls, washed by immersion in medium to remove non-adherent cells, and placed in a medium-filled well overnight.

### *Bioreactor cultivation and mechanical stimulation*

Two cell-seeded scaffolds were transferred into the custom-made mechano-bioreactor system [38], incubated overnight, then subjected to a sequence of 3 hours cyclic monoaxial compression ( $f = 1.0$  Hz,  $2A = 300 \mu\text{m} \triangleq 10\%$  scaffold height) and 5 hours resting consistently repeated over one week. During resting phases (at 2.5 h), sample position was automatically readjusted by applying sinusoidal oscillation of the upper arm ( $f = 0.2$  Hz,  $2A = 100 \mu\text{m}$ ) while the lower plunger moved up at a constant speed of  $10 \mu\text{m/s}$  until a force magnitude 10 mN was detected. Repositioning ensured proper mechanical stimulation even if the sample contracted over time.

### *Scaffold contraction measurement and mechanical testing*

Scaffold dimensions were assessed before and after bioreactor cultivation. Samples were scanned in both top and side view (resolution 1200 dpi, Epson Perfection #v200). Scaffold outlines were manually contoured to quantify cross sectional area and height of cylindrical samples. Relative sample contraction was calculated as ratio of scaffold measures after and before bioreactor cultivation. Additionally, samples were mechanically tested by monoaxial compression using a BOSE ElectroForce Mechanical Test Instruments TestBench system combined with a Model 31 Low load cell (Honeywell Corp.). Scaffolds were compressed in 3 cycles at 0.05 mm/s displacement speed over a distance of 10 % of the scaffold height calculated from scanned images before measurement. At 0 and 10 % strain, the position was kept constant for 30 seconds. Young's Modulus was calculated by linear fitting of stress-strain curves (range 4-10 %).
